# Supplementary material
Source: ML conference proceedings conference paper supplement (https://openaccess.thecvf.com/content/ICCV2023/html/Jeon_A_Unified_Framework_ICCV_2023_paper.html)
Supplement: Supplementary file 1 [file Jeon_A_Unified_Framework_ICCV_2023_supplemental.pdf]

# Appendix for “A Unified Framework for Robustness on Diverse Sampling Errors”

Myeongho Jeon    Myungjoo Kang    Joonseok Lee  
Seoul National University  
{andyjeon, mkang, joonseok}@snu.ac.kr

## A. Data Configuration

We report the overall data configuration for SDG (DG-CIFAR, PACS) and UBL (B-CIFAR, IMDB).

- **DG-CIFAR:** Following the original data split, the train set in CIFAR10 (50,000 images) is used for training and validation set is augmented to be 12 domain sets,  $\{fog, snow, frost, zoom\ blur, defocus\ blur, glass\ blur, speckle\ noise, shot\ noise, impulse\ noise, jpeg\ compression, pixelate, spatter\}$ , each of which is composed of 10,000 images.
- **PACS:** the train set of ‘photo’ (1,499) domain is used for training, and the model is evaluated on test sets of ‘art painting’ (2,048), ‘cartoon’ (2,344), ‘sketch’ (3,929) (Fig. II (b)).
- **B-CIFAR:** The augmented training set of CIFAR10 containing  $\{(airplane, fog), \dots, (truck, saturate)\}$  with 0.5% unbiased instances is used for training (50,000), and uniformly distributed test set (10,000) is employed for evaluation (Fig. I).
- **IMDB:** First, EB1 (16,800) is set as training set and EB2 (36,004), TEST are exploited for evaluation. Second, EB2 for training and EB1, TEST (22,468) for evaluation (Fig. II (a)).
  1. EB1: women aged 0-29, men aged 40+
  2. EB2: women aged 40+, men aged 0-29
  3. TEST: 0-29 or 40+ women and men

## B. Implementation Details

In all experiments, we initialize the backbone network  $F$  (ResNet18) by ImageNet-pretrained weights and set the batch size as 64. During training, we use stochastic gradient descent (SGD) optimizer with momentum (0.9), weight decay (0.0005).  $K$  is set as 5 for all the datasets, with a different kernel size of  $\text{Conv}$  and  $\text{Conv}^\top$ . We consider a residual block in ResNet18 as a layer  $l$  below.

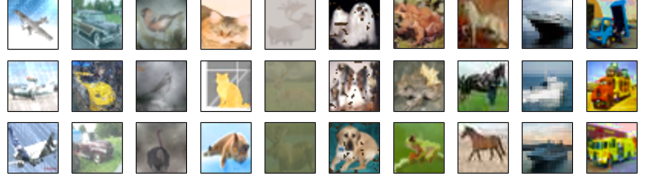

Figure I. B-CIFAR. To present corrupted CIFAR-10 image samples, we display B-CIFAR. Note that the images for DG-CIFAR are augmented in exactly the same way, only with different distributions. The figure is referenced by [1].

### DG-CIFAR.

- Input image: resized to (32,32), scaled to  $[-1,1]$ , normalized, and applied random horizontal flip.
- Epoch: 50.
- Architectural parameters:  $l = 4, M = 2$
- Learning rate: initialized as 0.005 and decayed to 0.0005 when epoch is 40.
- Balancing loss:  $\alpha = 0.0001, \beta_1 = 5, \beta_2 = 5$ , and  $\beta_3 = 0.1$ .

### PACS.

- Input image: resized to (224,224), scaled to  $[-1,1]$ , and normalized.
- Epoch: 50.
- Architectural parameters:  $l = 4, M = 3$
- Learning rate: 0.005 and decayed to 0.0005 when epoch is 40.
- balancing loss:  $\alpha = 0.1, \beta_1 = 3.33, \beta_2 = 3.33$ , and  $\beta_3 = 0.1$ .

### B-CIFAR.

- Input image: resized to (32,32), scaled to  $[-1,1]$ , and normalized.
- Epoch: 100.
- Architectural parameters:  $l = 4, M = 3$
- Learning rate: 0.005 and decayed to 0.0005 when epoch is 40.

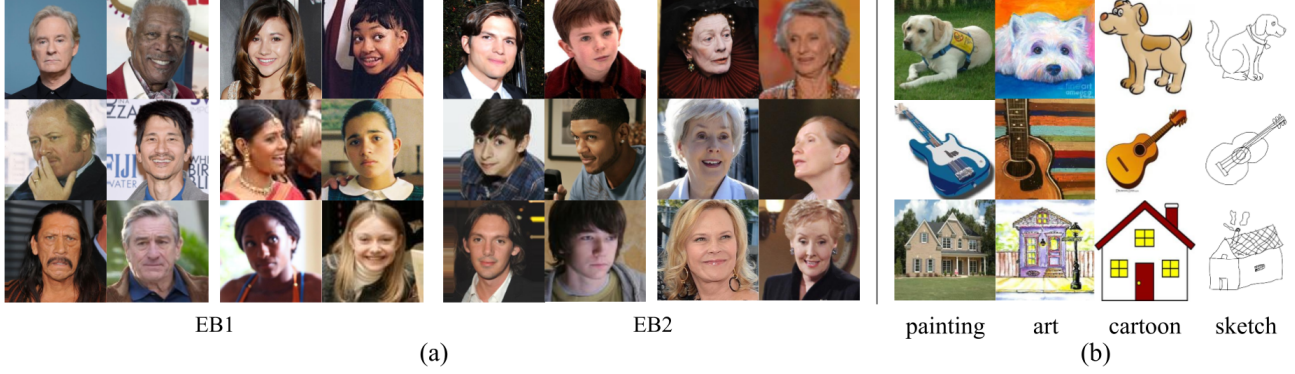

Figure II. Image samples of real-world datasets. (a) IMDB, (b) PACS. For PACS, we sample 3 classes, dog, guitar, and house, out of 7 classes

- Balancing loss:  $\alpha = 0.1$ ,  $\beta_1 = 3.33$ ,  $\beta_2 = 3.33$ , and  $\beta_3 = 0.1$ .

### IMDB.

- Input image: resized to (128,128).
- Epoch: 30.
- Architectural parameters:  $l = 4$ ,  $M = 3$
- Learning rate: 0.005 and decayed to 0.0005 when epoch is 24.
- Balancing loss:  $\alpha = 0.1$ ,  $\beta_1 = 1$ ,  $\beta_2 = 1$ , and  $\beta_3 = 0.1$ .

### References

- [1] Myeongho Jeon, Hyoje Lee, Yedarm Seong, and Myungjoo Kang. Learning without prejudices: Continual unbiased learning via benign and malignant forgetting. In *International Conference on Learning Representations*, 2023. [i](#)
